# Supplementary material
Source: Copernicus journal article supplement (doi:10.5194/acp-26-6929-2026)
Supplement: Supplementary file 1 [file acp-26-6929-2026-supplement.pdf]

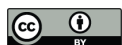

*Supplement of*

**Measurement report: Insights into the high temporal variability of atmospheric carbon dioxide (CO<sub>2</sub>) at a suburban station in the Indo-Gangetic Plain**

**Vimal Jose Vazhathara et al.**

*Correspondence to:* Vimal Jose Vazhathara (vimaljosevazhathara@gmail.com)

The copyright of individual parts of the supplement might differ from the article licence.

1 This Supporting Information file contains 1 section, 6 figures and 3 tables in 11 pages.

## 2 **S1. Calibration details**

3  
4 The Picarro G2301 analyser was calibrated using four NOAA-certified primary standard  
5 cylinders containing known concentrations of CO<sub>2</sub> and CH<sub>4</sub> (Table S3). Each cylinder was  
6 sampled for 15 minutes in an ascending concentration sequence, repeated twice (Figure S6),  
7 resulting in a total measurement time of 30 minutes per cylinder over a 2-hour session. An  
8 automated multiport valve controller handled the switching between cylinders to ensure  
9 consistency and reduce manual error, while also testing the instrument's stability during  
10 calibration. Minute averages and standard deviations were calculated after excluding the initial  
11 3–4 minutes of each run to allow for stabilisation (Laurent, 2016). Only minute averages with  
12 standard deviations below 0.04 ppm for CO<sub>2</sub> and 0.0004 ppm for CH<sub>4</sub> were used. These were  
13 averaged first per sequence and then across sequences to determine final mean values and  
14 standard deviations for each cylinder.

15 A weighted least squares regression was used to generate a linear calibration curve of the form:

$$16 \quad Y = a_0 + (a_1 \times x) \quad (S1)$$

17  
18 where x is the certified concentration (NOAA value) and y is the analyser's reading. For  
19 correcting measured values, the inverse was applied:

$$20 \quad X = \frac{(y-a_0)}{a_1} \quad (S2)$$

21  
22  
23 The four standard cylinders were chosen to cover the expected concentration range at the site,  
24 and the primary calibration was performed annually.

## 25 **S2. Details of other monitoring stations**

26  
27 The comparison sites include five Indian monitoring stations and six international stations. The  
28 five Indian sites that reported CO<sub>2</sub> mole fraction were Shadnagar (SDN; 17.09° N, 78.2° E),  
29 Gadanki (GDN; 13.50° N, 79.20° E), Mohali (MHL; 30.67° N, 76.73° E), Sinhagad (SNG;  
30 18.21° N, 73.45° E) and Ahmedabad (AHM; 23.03° N, 72.55° E). Apart from Indian sites, six  
31 sites in the same latitudinal band (using ObsPACK) were compared. These sites were Mauna  
32 Lou (MLO; 19.54° N, 155.58° W), South Carolina (SCT; 33.40° N, 81.83° W), Shenandoah  
33 National Park (SNP; 38.61° N, 78.35° W), Walnut Grove, (WGC; 38.26° N, 121.49° W),  
34 Moody (WKT; 31.31° N, 97.33° W) and Boulder (BAO; 40.05° N, 105.00° W). Figure 7b  
35 compares the seasonal amplitude of the sites in the chosen latitudinal band. The inset in Figure  
36 7b shows the location of all the measurement sites. For all non-Indian sites except BAO, the  
37 five-year average (2018-2022) has been chosen for the seasonality. For BAO, 2011-2016 has  
38 been used for this study (due to a lack of coinciding data).  
39

40

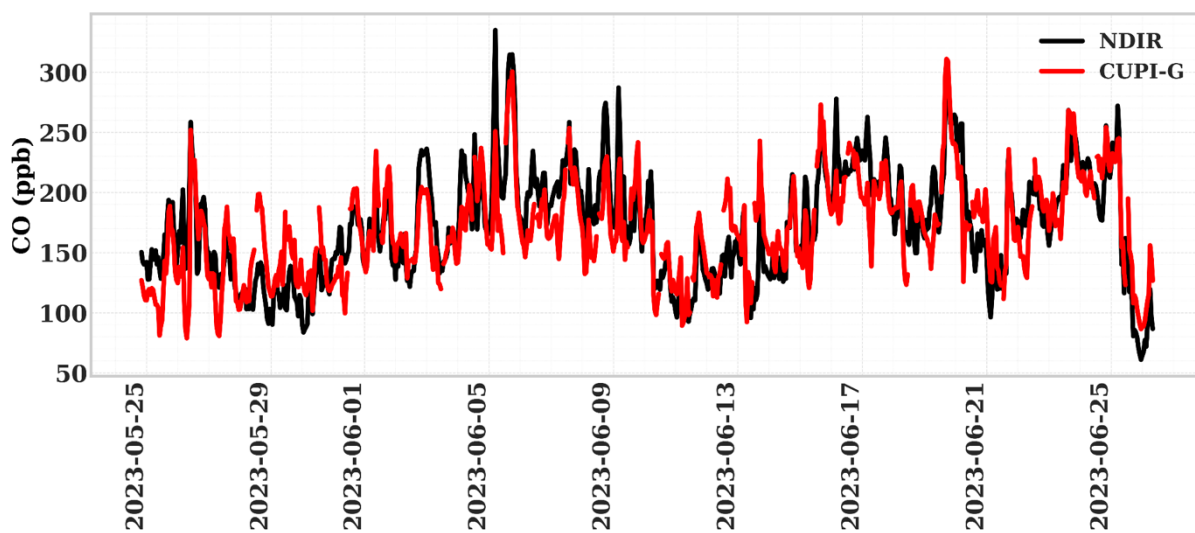

41

42 **Figure S1:** Comparison of CO from CUPI-G (red) with Thermo Scientific Model 48i/48j CO  
43 Analyser (NDIR) at Nagasaki University during the calibration period (May-June 2023)

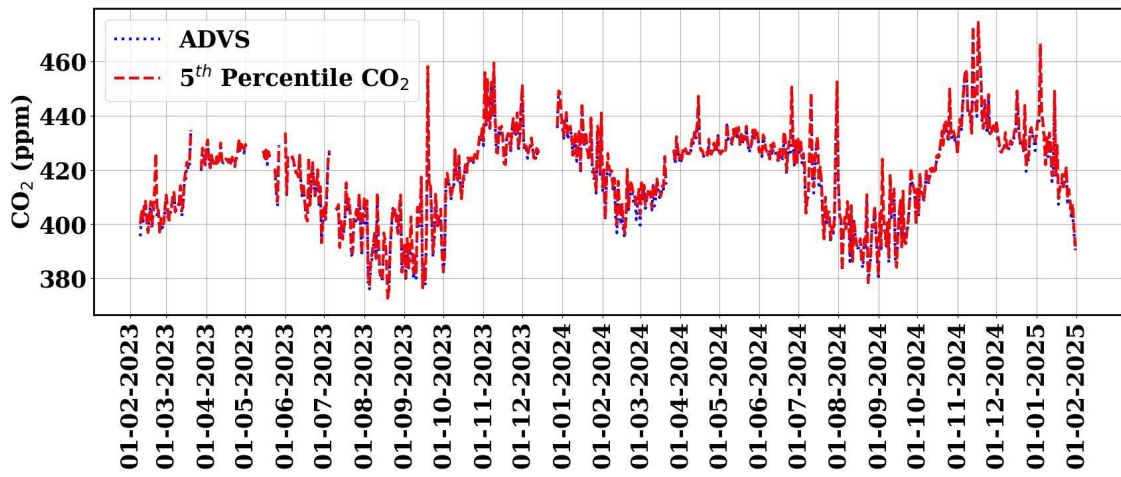

44  
 45 **Figure S2:** Comparison of background concentrations of atmospheric CO<sub>2</sub> estimated using the  
 46 Adaptive Diurnal Variation Selection (ADVS) method and the fifth percentile method for the  
 47 study period.  
 48

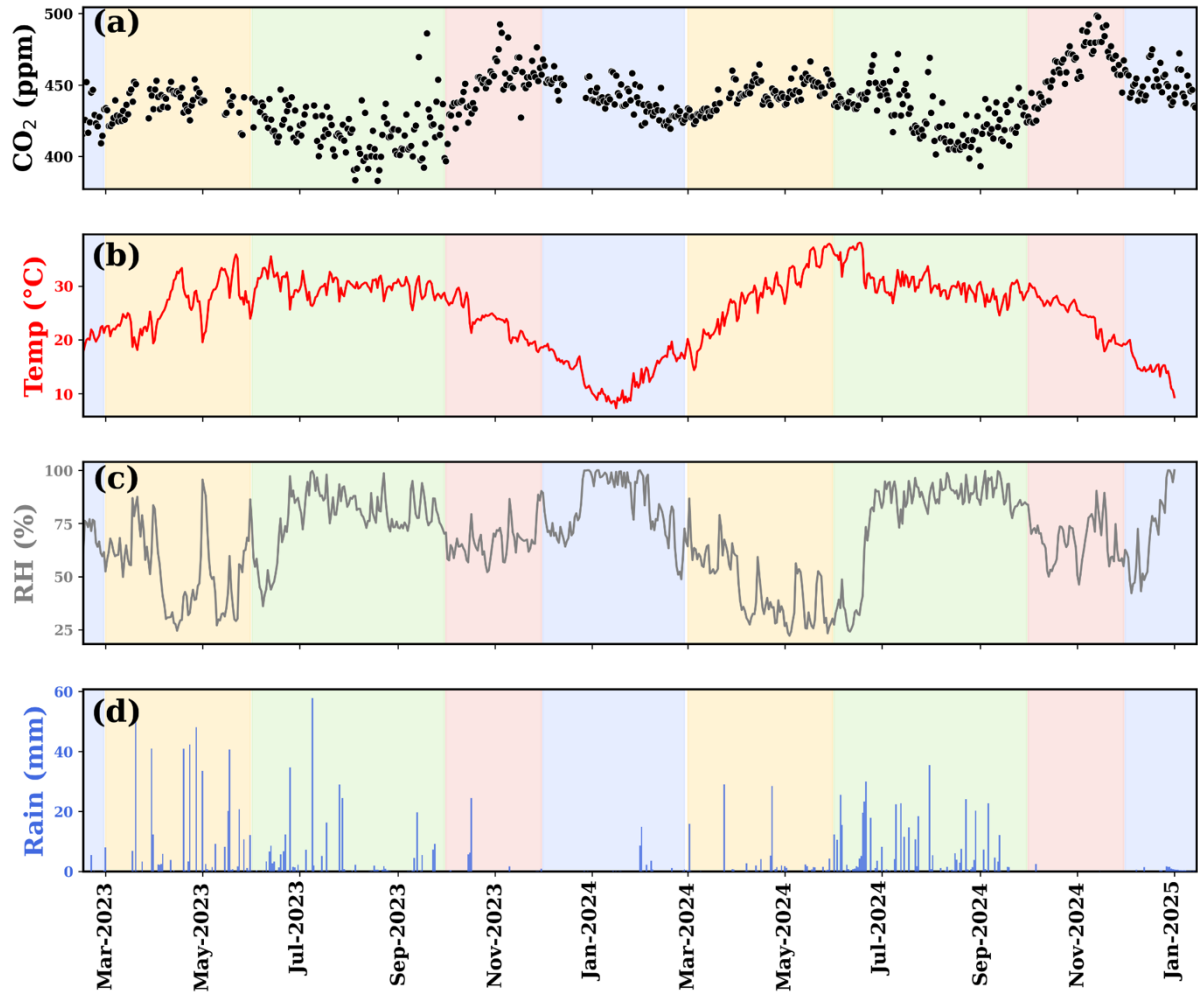

50

51 **Figure S3:** Daily variation in atmospheric carbon dioxide concentrations (a) and  
 52 meteorological parameters (air temperature, relative humidity and rain) over Sonipat (b-d)  
 53 during the study period. All measurements have been made using the Automatic Weather  
 54 Station (AWS) in Sonipat.

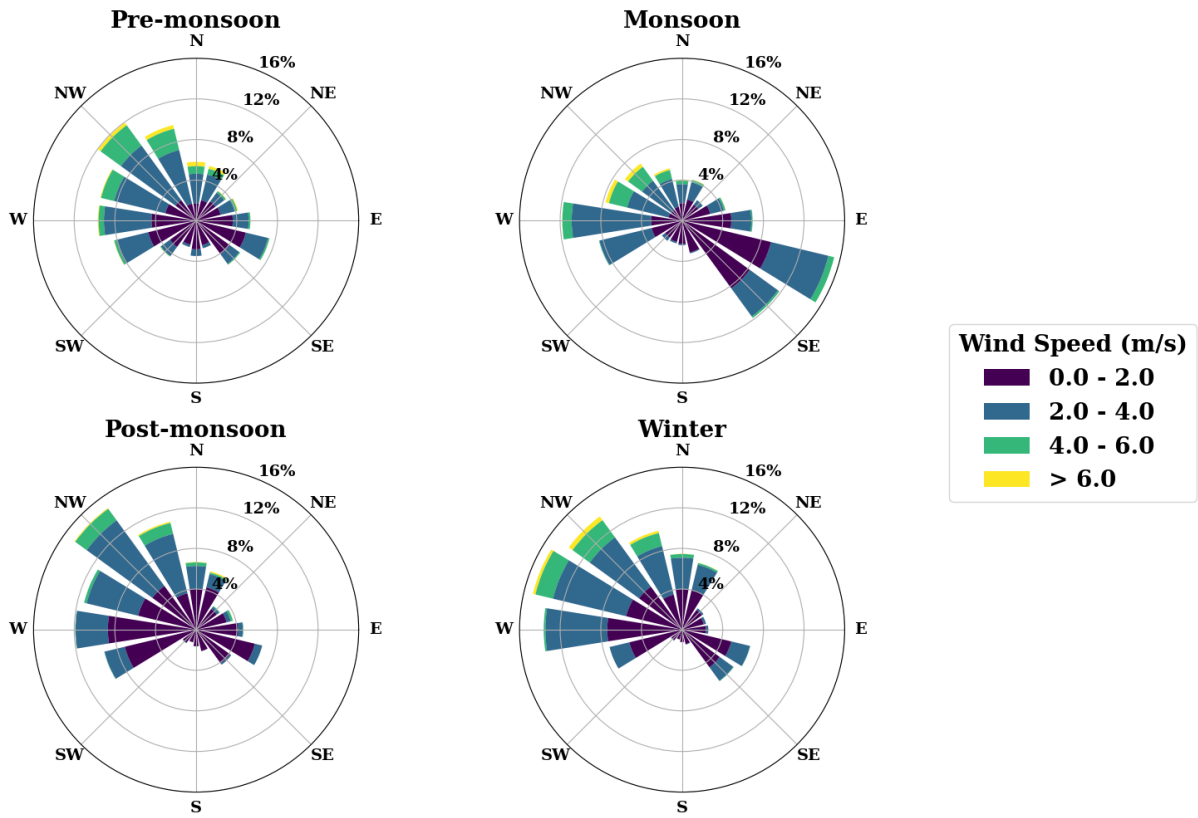

55  
56  
57

**Figure S4:** Seasonal variation in the wind pattern over Sonipat during the study period.

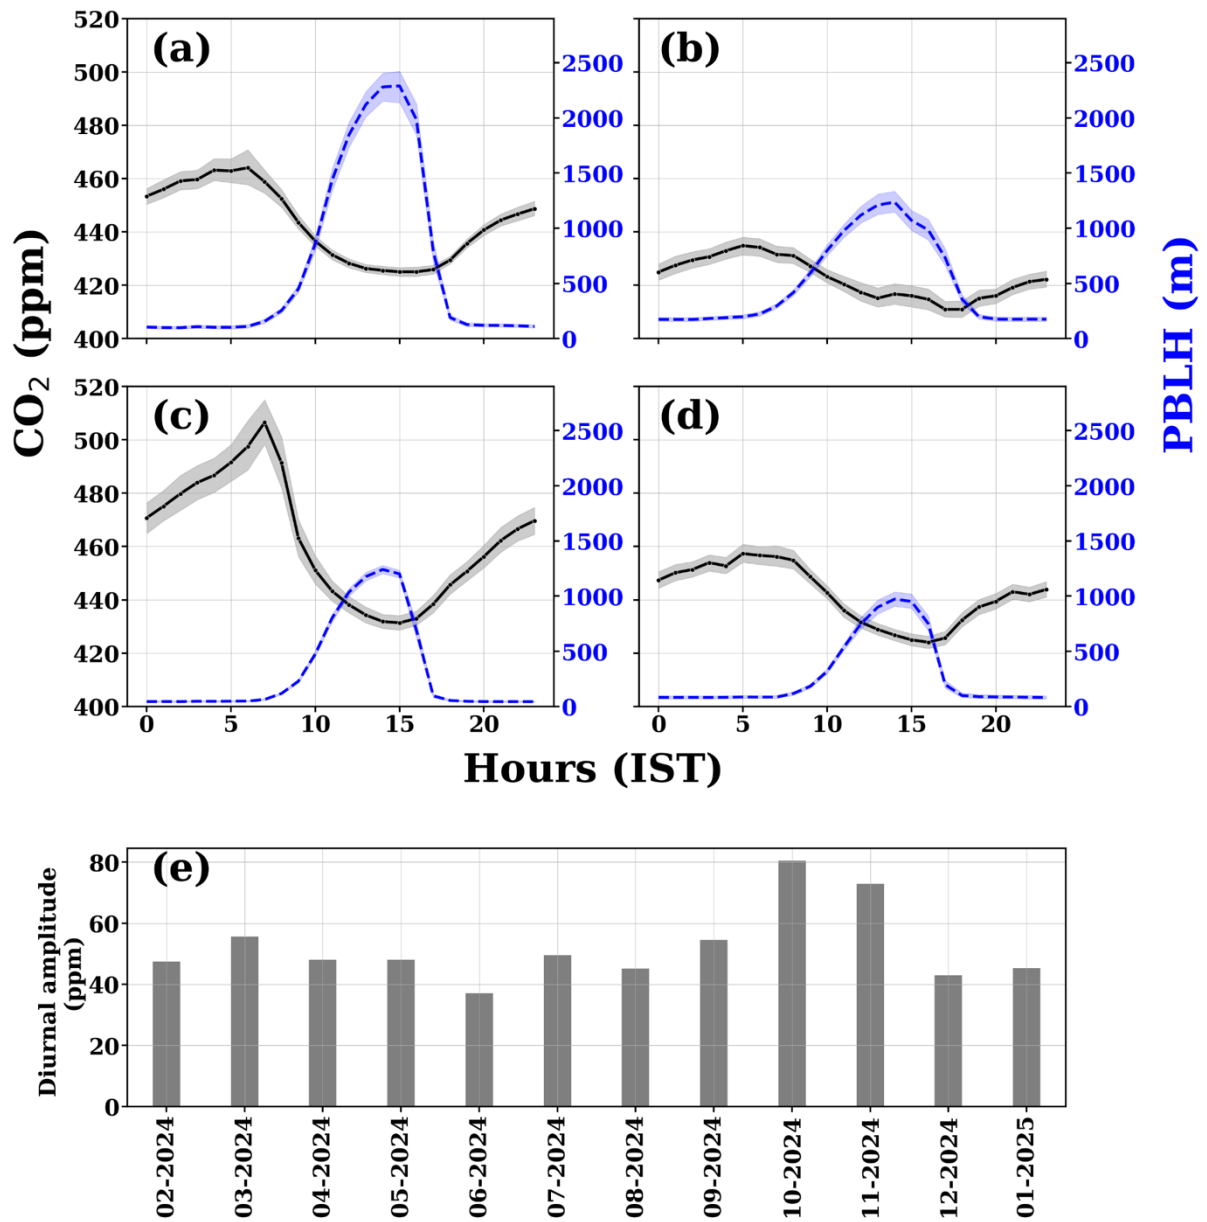

58  
 59 **Figure S5:** (a - d) Average diurnal variation of CO<sub>2</sub> over Sonipat during the pre-monsoon  
 60 (MAM), monsoon (JJAS), post-monsoon (ON) and winter (DJF) seasons with planetary  
 61 boundary layer height (blue), (e) monthly variation of the average diurnal amplitude of CO<sub>2</sub>  
 62 from February 2024 to January 2025.

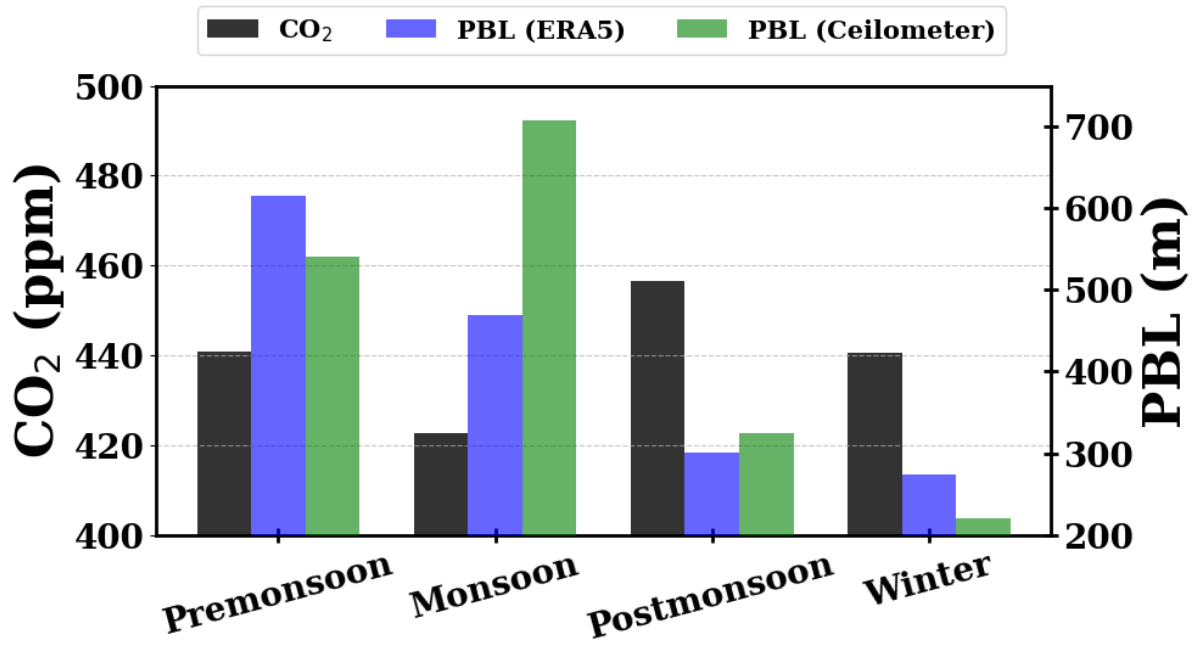

63  
64  
65  
66

**Figure S6:** Comparison of seasonal means of atmospheric CO<sub>2</sub> concentrations with PBLH over Sonipat.

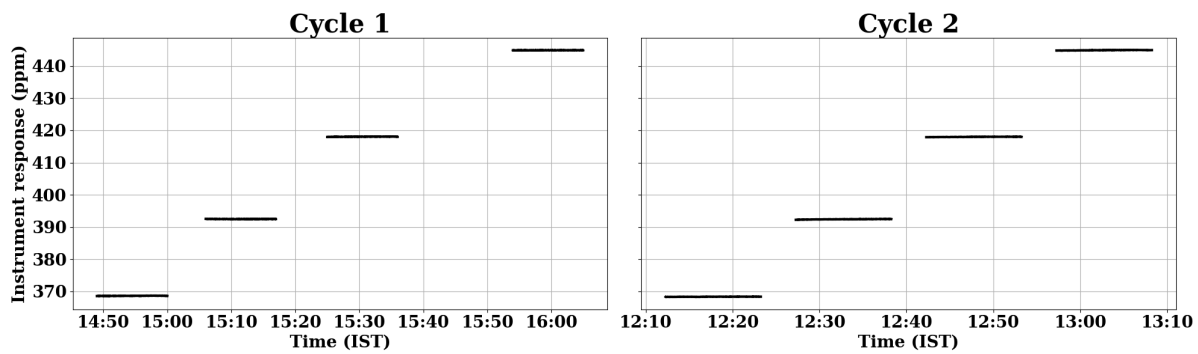

67  
68  
69

**Figure S7:** Calibration procedure using four NOAA-certified standard gases for CO<sub>2</sub> and CH<sub>4</sub>.

70 **Table S1:** Annual, seasonal mean, and seasonal variation of the average diurnal amplitude of  
71 CO<sub>2</sub> over Sonipat during the study period compared with other study sites over India. Seasons  
72 have been defined as pre-monsoon (MAM), monsoon (JJAS), post-monsoon (ON), and winter  
73 (DJF).  
74

| Location                 | Site       | Study Period        | Reference              | Annual Mean (ppm) | Pre-monsoon |                         | Monsoon    |                         | Post-monsoon |                         | Winter     |                         |
|--------------------------|------------|---------------------|------------------------|-------------------|-------------|-------------------------|------------|-------------------------|--------------|-------------------------|------------|-------------------------|
|                          |            |                     |                        |                   | Mean (ppm)  | Diurnal Amplitude (ppm) | Mean (ppm) | Diurnal Amplitude (ppm) | Mean (ppm)   | Diurnal Amplitude (ppm) | Mean (ppm) | Diurnal Amplitude (ppm) |
| Sonipat, Haryana         | Semi-urban | Feb 2023 – Jan 2025 | This study             | 440.8             | 440.8       | 49.9                    | 422.6      | 46.3                    | 456.4        | 69.6                    | 440.5      | 44.5                    |
| Mohali, Punjab*          | Semi-urban | Jan 2017 – Dec 2017 | Thilakan et al., 2023  | 428.8             | ~ 409.0     |                         | ~ 400.2    |                         | ~ 417.5      |                         | 406.7      |                         |
| Ahmedabad, Gujarat*      | Urban      | Nov 2013 – May 2015 | Chandra et al., 2016   | 413.0             | ~ 413.3     | ~ 10.0                  | ~ 401.7    | ~ 10.0                  | ~ 422.5      | ~ 40.0                  | ~ 420.0    | ~ 30.0                  |
| Sinhagad, Maharashtra    | Semi-urban | Jul 2014 – Nov 2015 | Metya et al., 2021     | 406.1             | 416.9       | 2.8                     | 400.2      | 10.0                    | 401.8        | 4.1                     | 409.9      | 1.9                     |
| Shadnagar, Telangana**   | Semi-urban | Jan 2014 – Dec 2014 | Sreenivas et al., 2016 | 394.0             | ~ 394.5     | ~ 25.0                  | ~ 386.3    | ~ 15.0                  | ~ 386.5      | ~ 17.0                  | ~ 383.5    | ~ 15.0                  |
| Gadanki, Andhra Pradesh* | Rural      | Apr 2016 – Apr 2019 | Jain et al., 2021      | 420.0             | 419.8       | ~ 20.0                  | 414.2      | ~ 23.0                  | 423.7        | ~ 55.0                  | 421.8      | ~ 35.0                  |

75

76 \* Monsoon has been defined as JJA, and post-monsoon has been defined as SON.

77 \*\* Post-monsoon has been defined as OND.

78 **Table S2:** Seasonal amplitude of CO<sub>2</sub>, peak, and draw-down months over Sonipat during the  
79 study period compared with other study sites over India. Seasons have been defined as pre-  
80 monsoon (MAM), monsoon (JJAS), post-monsoon (ON), and winter (DJF).  
81

| Location                 | Site       | Study Period        | Reference              | CO <sub>2</sub> Peak (month) (ppm) | CO <sub>2</sub> Draw-down (month) (ppm) | Seasonal Amplitude (ppm) |
|--------------------------|------------|---------------------|------------------------|------------------------------------|-----------------------------------------|--------------------------|
| Sonipat, Haryana         | Semi-urban | Feb 2023 – Jan 2025 | This study             | 470 (November)                     | 410 (August)                            | 60                       |
| Mohali, Punjab*          | Semi-urban | Jan 2017 – Dec 2017 | Thilakan et al., 2023  | 420 (November)                     | 390 (August)                            | 30                       |
| Ahmedabad, Gujarat*      | Urban      | Nov 2013 – May 2015 | Chandra et al., 2016   | 425 (November)                     | 390 (July)                              | 35                       |
| Sinhagad, Maharashtra    | Semi-urban | Jul 2014 - Nov 2015 | Metya et al., 2021     | 428 (May)                          | 398 (October)                           | 30                       |
| Shadnagar, Telangana**   | Semi-urban | Jan 2014 – Dec 2014 | Sreenivas et al., 2016 | 405 (September)                    | 390 (May)                               | 15                       |
| Gadanki, Andhra Pradesh* | Rural      | Apr 2016 – Apr 2019 | Jain et al., 2021      | 425 (November)                     | 405 (August)                            | 20                       |

82  
83

84 **Table S3:** Details of the calibration using the NOAA cylinders.

|                |                    | Reference value       |                       | Measured value        |                       |
|----------------|--------------------|-----------------------|-----------------------|-----------------------|-----------------------|
|                | Cylinder serial no | CO <sub>2</sub> (ppm) | CH <sub>4</sub> (ppb) | CO <sub>2</sub> (ppm) | CH <sub>4</sub> (ppb) |
|                | CY1:-CB11849       | 370                   | 1720                  | 368.61 ± 0.03         | 1743.4 ± 0.2          |
| <b>Cycle 1</b> | CY2:-CB11881       | 395                   | 1837                  | 392.47 ± 0.03         | 1844.2 ± 0.2          |
|                | CY3:-CB11841       | 420                   | 1880                  | 418.05 ± 0.04         | 1899.3 ± 0.2          |
|                | CY4:-CB11973       | 450                   | 2100                  | 444.90 ± 0.02         | 2104.1 ± 0.2          |
|                | CY1:-CB11849       | 370                   | 1720                  | 368.33 ± 0.03         | 1743.4 ± 0.2          |
| <b>Cycle 2</b> | CY2:-CB11881       | 395                   | 1837                  | 392.39 ± 0.06         | 1844.0 ± 0.1          |
|                | CY3:-CB11841       | 420                   | 1880                  | 417.99 ± 0.05         | 1899.3 ± 0.1          |
|                | CY4:-CB11973       | 450                   | 2100                  | 444.91 ± 0.06         | 2104.1 ± 0.2          |

85

86
